# Table of Contents

## FEATURES

### *WWW.Life Sciences Education*

#### **Darwin on the Web: Resources for Darwin 200 and Beyond**

Louisa A. Stark .....1-6

### *Educator Highlight*

#### **Ron Hoy**

Interviewed by Laura L. Mays Hoopes .....7-8

### *Current Insights*

#### **Recent Research in Science Teaching and Learning**

Erin Dolan .....9-10

### *Book Review*

#### **It Isn't Easy Glowing Green**

Jennifer Loertscher .....11-12

### *Book Review*

#### **A Crash Course in Evolution**

Karen Kalumuck .....13-14

## ESSAY

#### **Enhancing Interdisciplinary, Mathematics, and Physical Science in an Undergraduate Life Science Program through Physical Chemistry**

David P. Pursell .....15-28

## ARTICLES

#### **A Combination of Hand-held Models and Computer Imaging Programs Helps Students Answer Oral Questions about Molecular Structure and Function: A Controlled Investigation of Student Learning**

Michelle A. Harris, Ronald F. Peck, Shannon Colton, Jennifer Morris, Elias Chaibub Neto, and Julie Kallio .....29-43

#### **Minimal Impact of Organic Chemistry Prerequisite on Student Performance in Introductory Biochemistry**

Robin Wright, Sehoya Cotner, and Amy Winkel .....44-54

#### **Can an Inquiry Approach Improve College Student Learning in a Teaching Laboratory?**

Steven W. Rissing and John G. Cogan .....55-61

#### **High School Intervention for Influenza Biology and Epidemics/Pandemics: Impact on Conceptual Understanding among Adolescents**

Nancy Dumais and Abdelkrim Hasni .....62-71

#### **Evaluation of the Redesign of an Undergraduate Cell Biology Course**

Laura April McEwen, dik Harris, Richard F. Schmid, Jackie Vogel, Tamara Western, and Paul Harrison .....72-78

#### **Stem Cells and Society: An Undergraduate Course Exploring the Intersections among Science, Religion, and Law**

Chris Pierret and Patricia Friedrichsen .....79-87

### *On the Cover*

Cover shows a hand-held physical model of a heterotrimeric G-protein, made from coordinates in the Protein Data Bank. The G $\alpha$  subunit is shown in white, the G $\beta$  subunit in blue, and the G $\gamma$  subunit in yellow. The bound GDP is not visible in the picture angle shown. In the article on p. 29, Harris *et al.* demonstrate the learning value of such models in conjunction with 2D computer representations from a molecular imaging program in helping students understand the 3D protein structure-function relationships.
